# Supplementary material
Source: PubMed Central journal article supplement (PMC3644635)
Supplement: mmc1.pdf [file mmc1.pdf]

## Supplemental Data

### FOXP2 Targets Show Evidence

### of Positive Selection in European Populations

Qasim Ayub, Bryndis Yngvadottir, Yuan Chen, Yali Xue, Min Hu, Sonja C. Vernes, Simon E. Fisher, and Chris Tyler-Smith

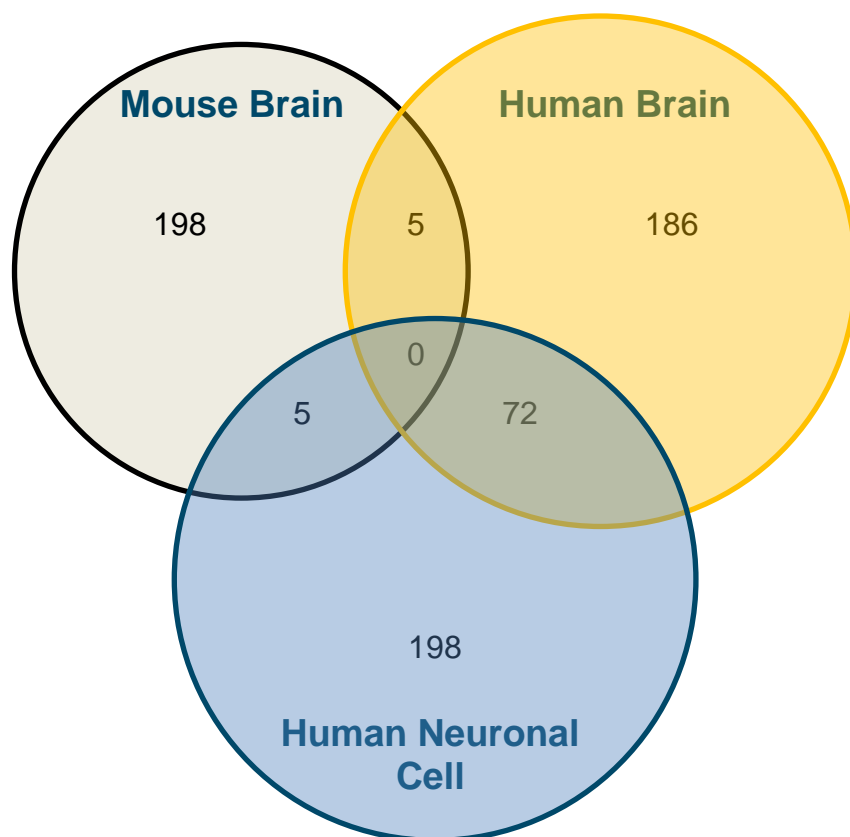

**Figure S1. Overlap of FOXP2 Targets**

FOXP2 targets were identified in three separate chromatin immunoprecipitation genomic screens.

**A**

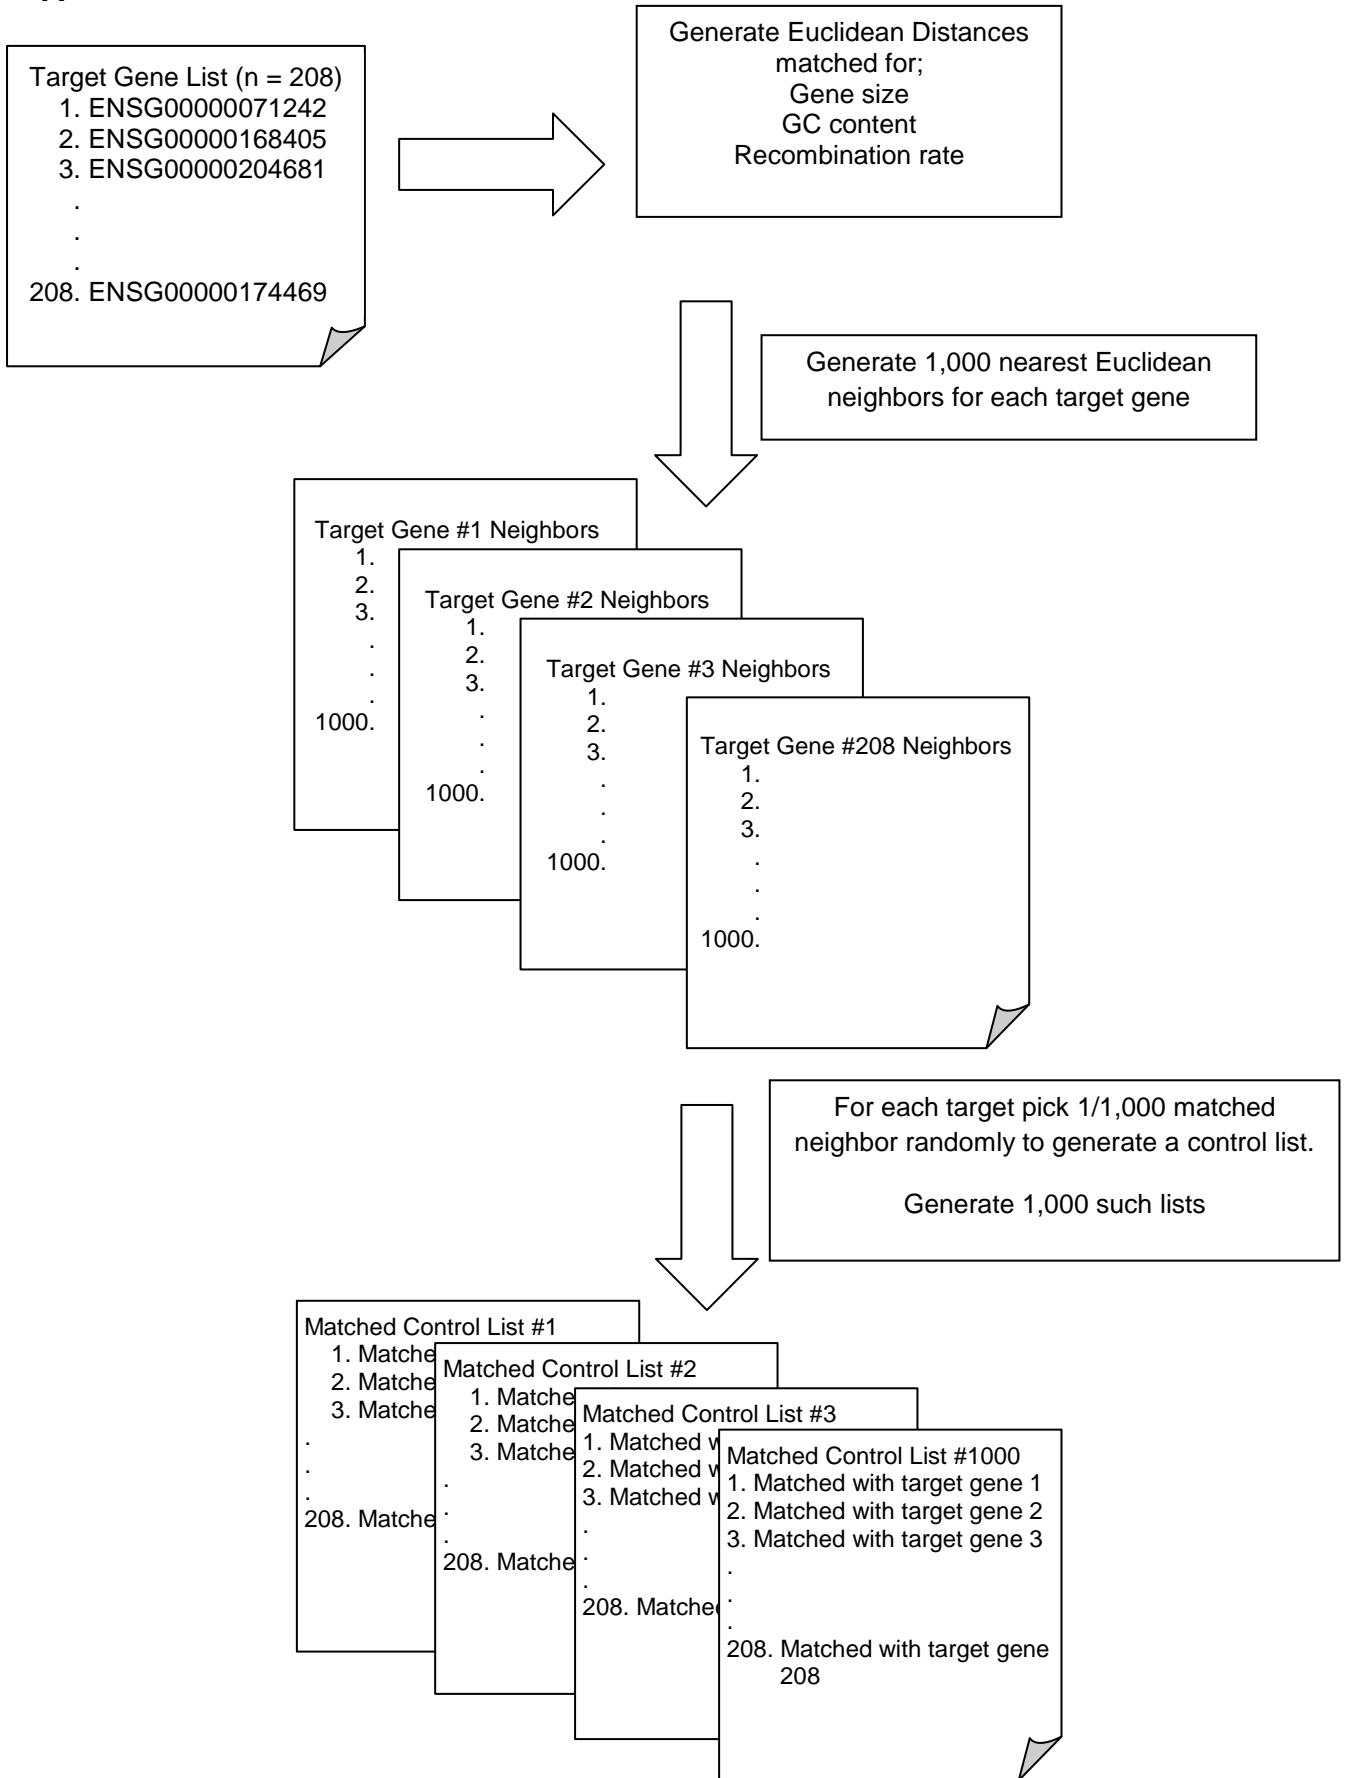

**B**

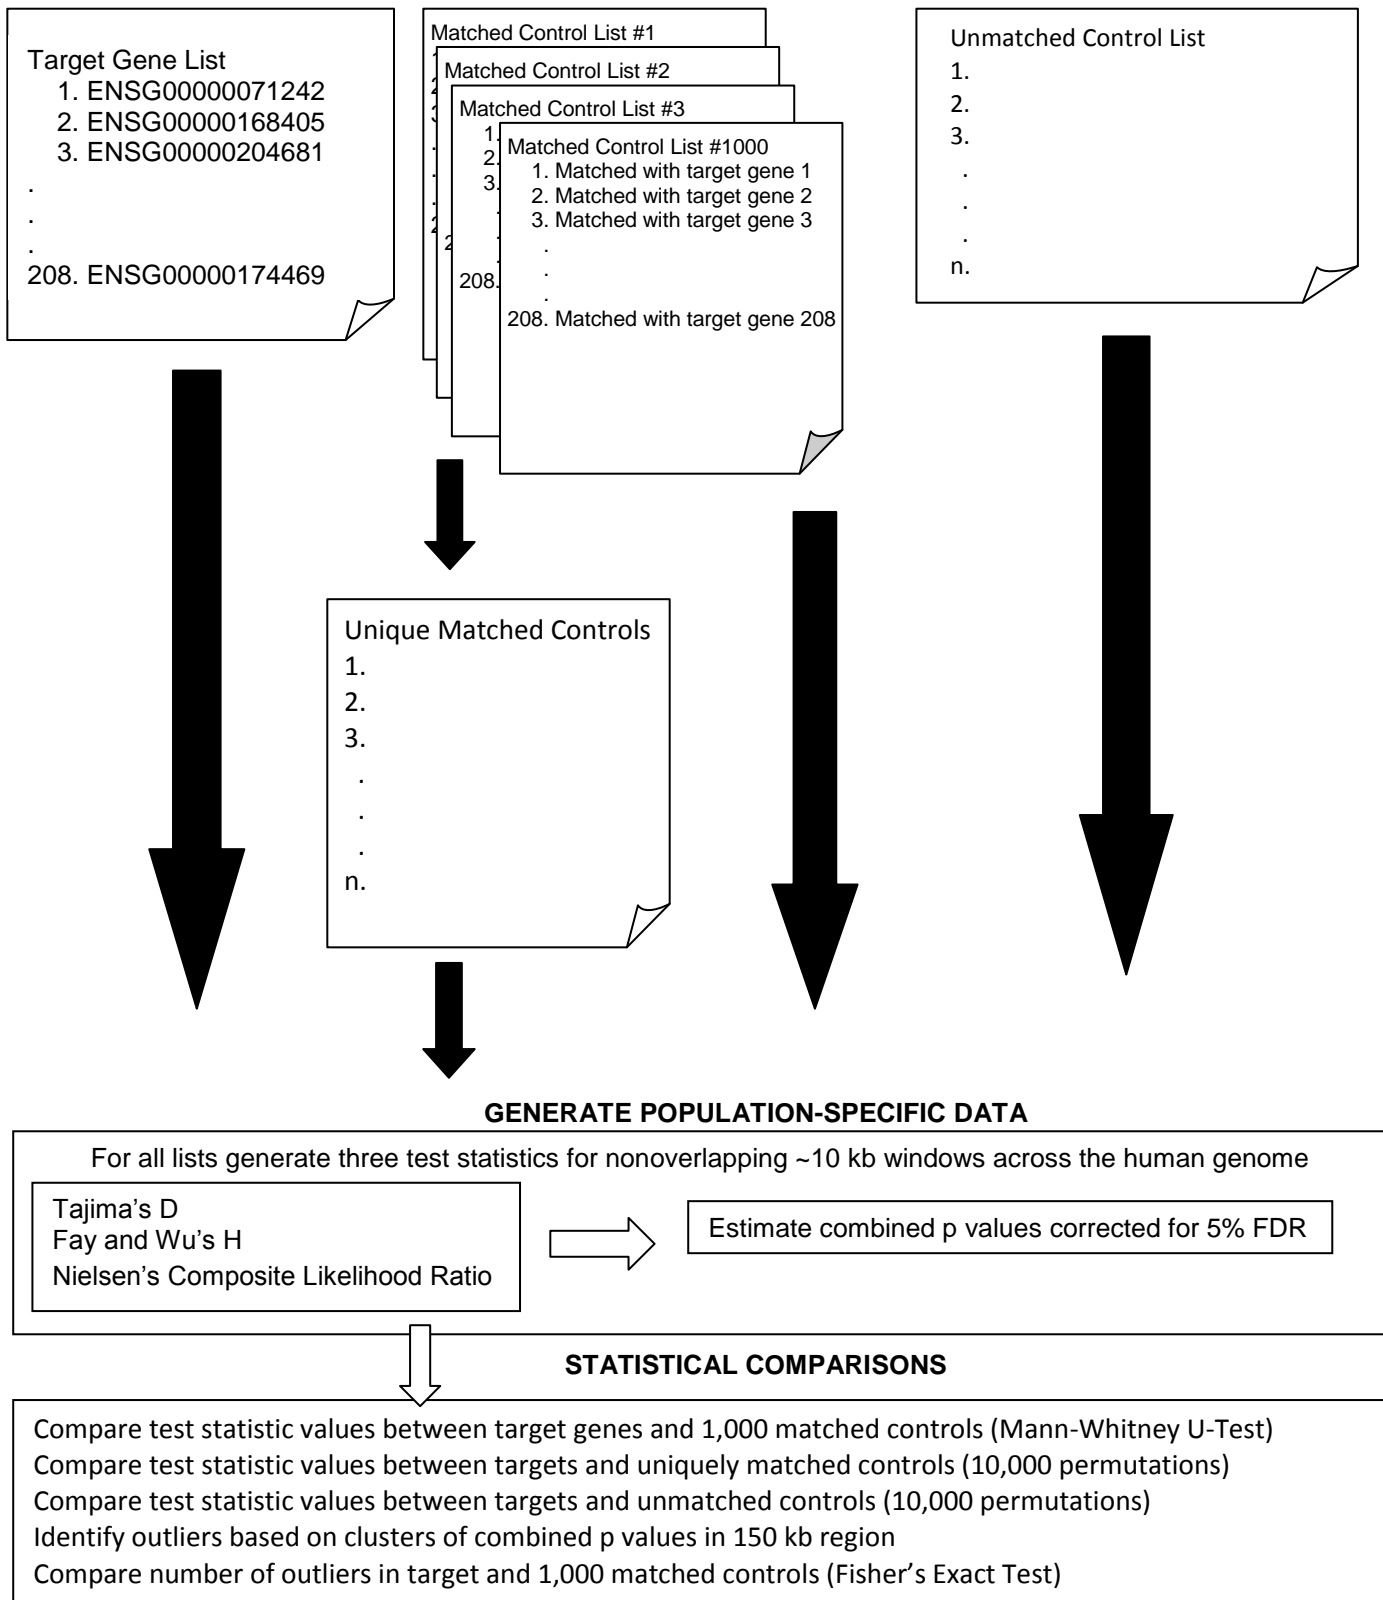

**Figure 2. Schema of the Analyses Pipeline**

(A) Generation of control lists for putative target list of 208 genes.

(B) Data generation and statistical analyses.

**A**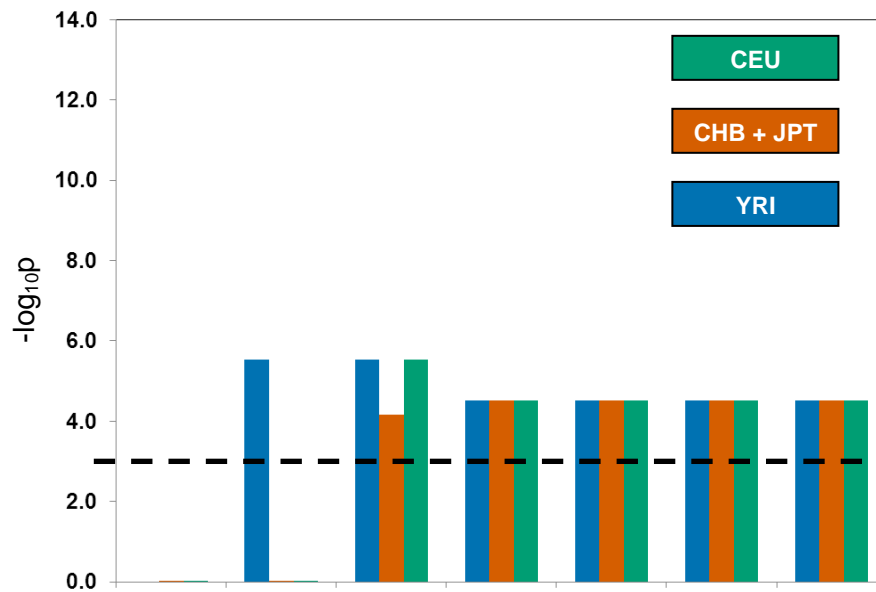**B**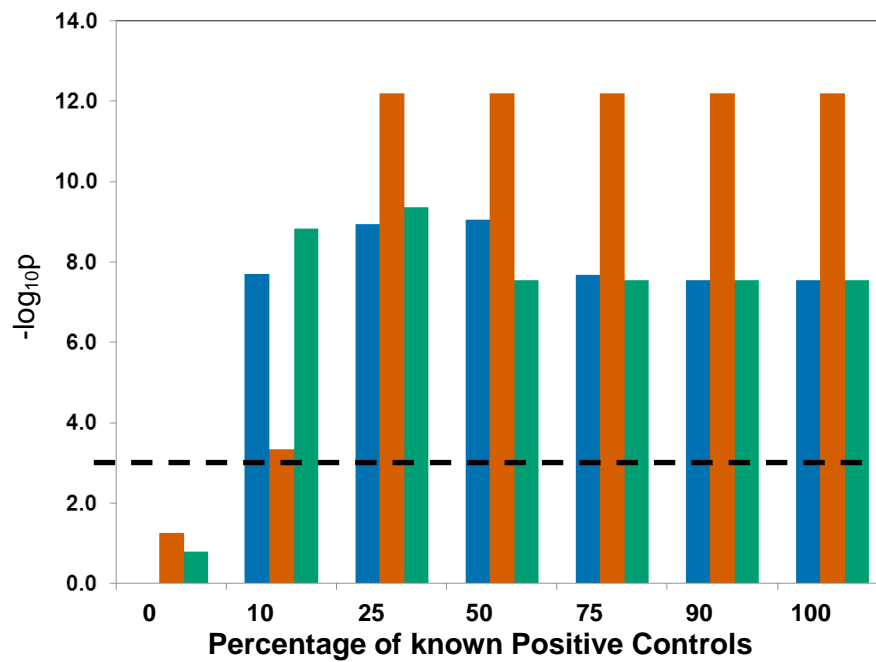**Figure S3. Sensitivity of the Pipeline**

Sensitivity was tested by varying proportion of known positively selected genes identified by frequency spectrum based tests in 1000 Genomes Project (A) Mann Whitney U and (B) Permutation test comparisons. The dashed horizontal line depicts the threshold of the  $-\log_{10}p$  value for multiple comparisons.

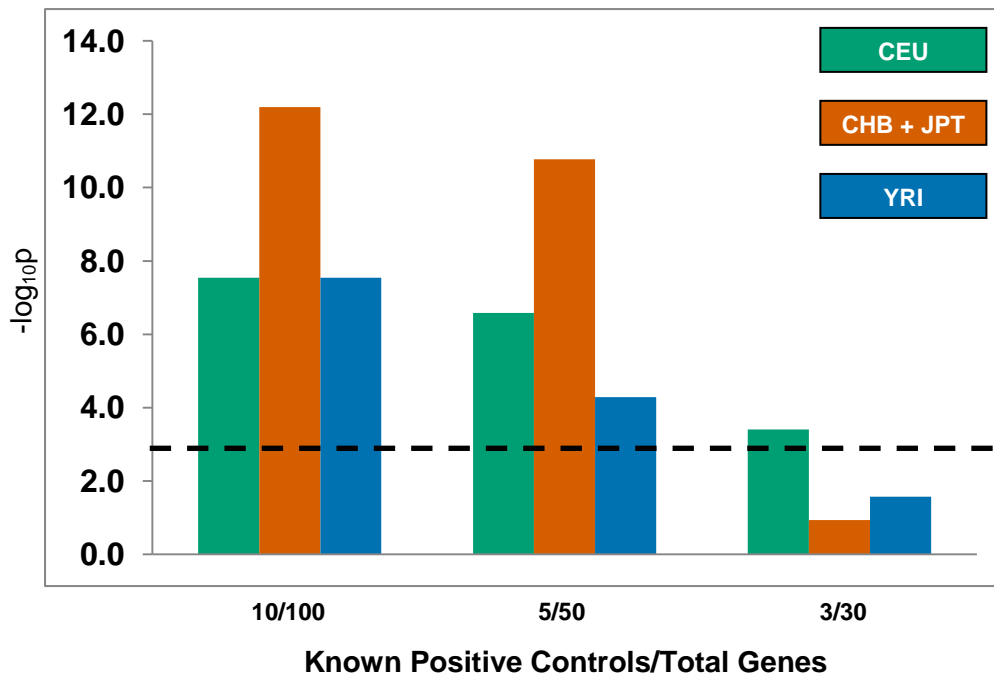

**Figure S4. Detection of Signals in Lists Containing 100, 50, and 30 Genes**

The method was able to detect a signal when at least 10% of the genes in a list under investigation are under selection. Gene lists containing 100, 50, and 30 genes with 10, 5, and 3 known positives were analysed. A selection signal was detected in all populations for the 100 and 50 gene sets but only in CEU for the 30 gene set. Permutation test comparisons are shown and the dashed horizontal line represents the threshold of the  $-\log_{10}p$  value for multiple comparisons.

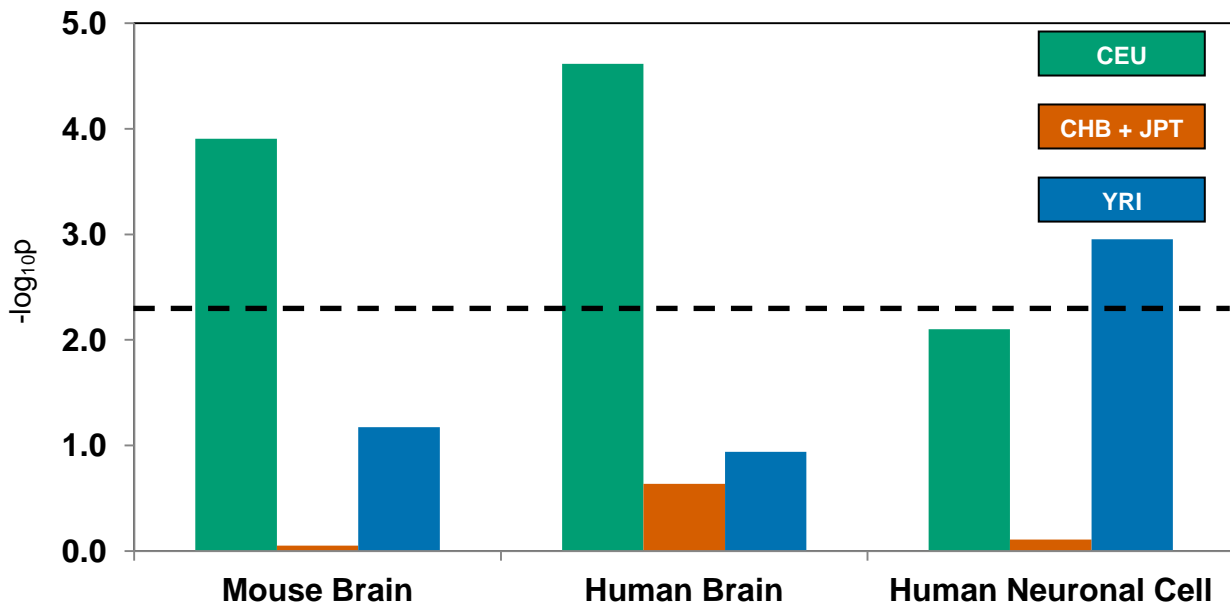

**Figure S5. Evidence of Positive Selection in FOXP2 Targets from Three Separate Chromatin Immunoprecipitation Genomic Screens Using a Ranking Strategy**

FOXP2 targets identified by ChIP in mouse and human brain are enriched with positive selection in CEU. The dashed horizontal line depicts the threshold of the  $-\log_{10}p$  value for multiple comparisons after applying the Bonferroni correction.

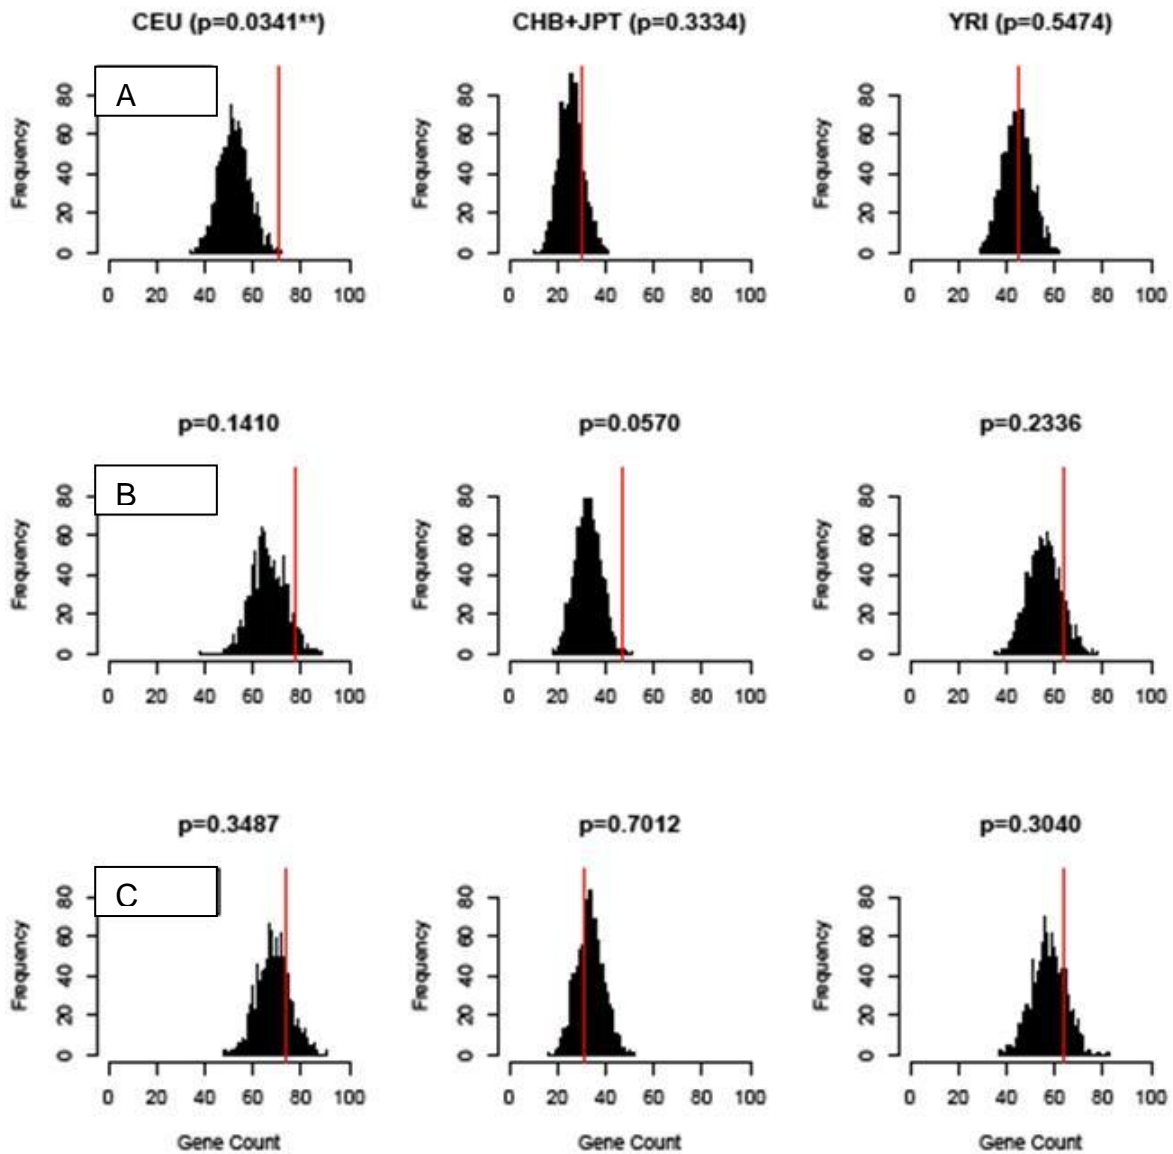

**Figure S6. Number of FOXP2 Targets that Are Significant Outliers in the CEU, CHB + JPT, and YRI Populations**

Mouse brain (A), human brain (B), and human neuronal cell (C). Comparison shows the number of 150 kb regions with at least two significant ~10 kb windows in FOXP2 targets (vertical red lines) with the distribution of such regions in 1,000 matched control lists.

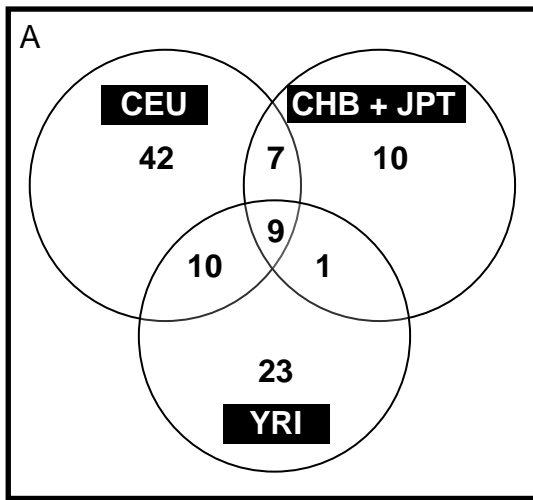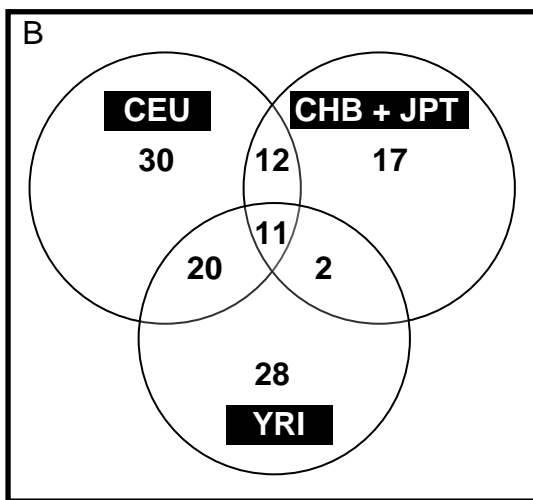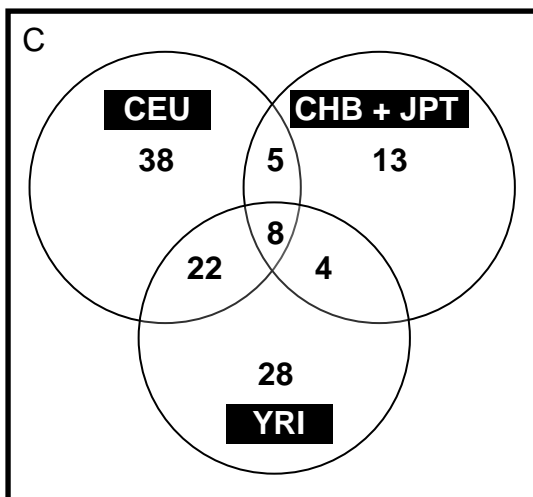

**Figure S7. Venn Diagram Showing Distribution of FOXP2 Targets that Are Significant Outliers in the CEU, CHB + JPT, and YRI Populations**

Mouse brain (A), human brain (B), and human neuronal cell (C).



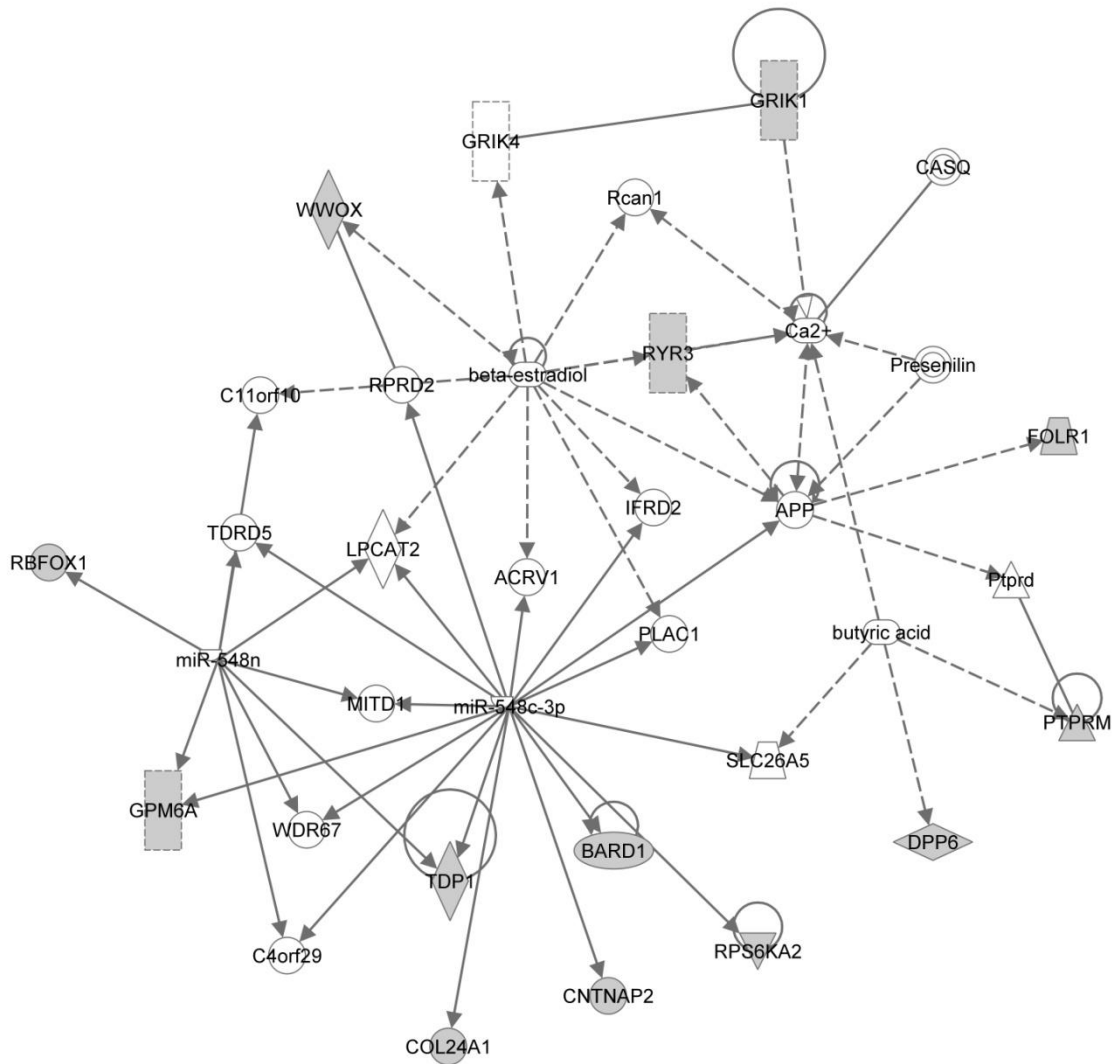

© 2000-2011 Ingenuity Systems, Inc. All rights reserved.

### Figure S8. Ingenuity Pathway Analysis

Network shows FDXP2 targets (grey boxes) selected in CEU that are associated with cardiac arteriopathy.

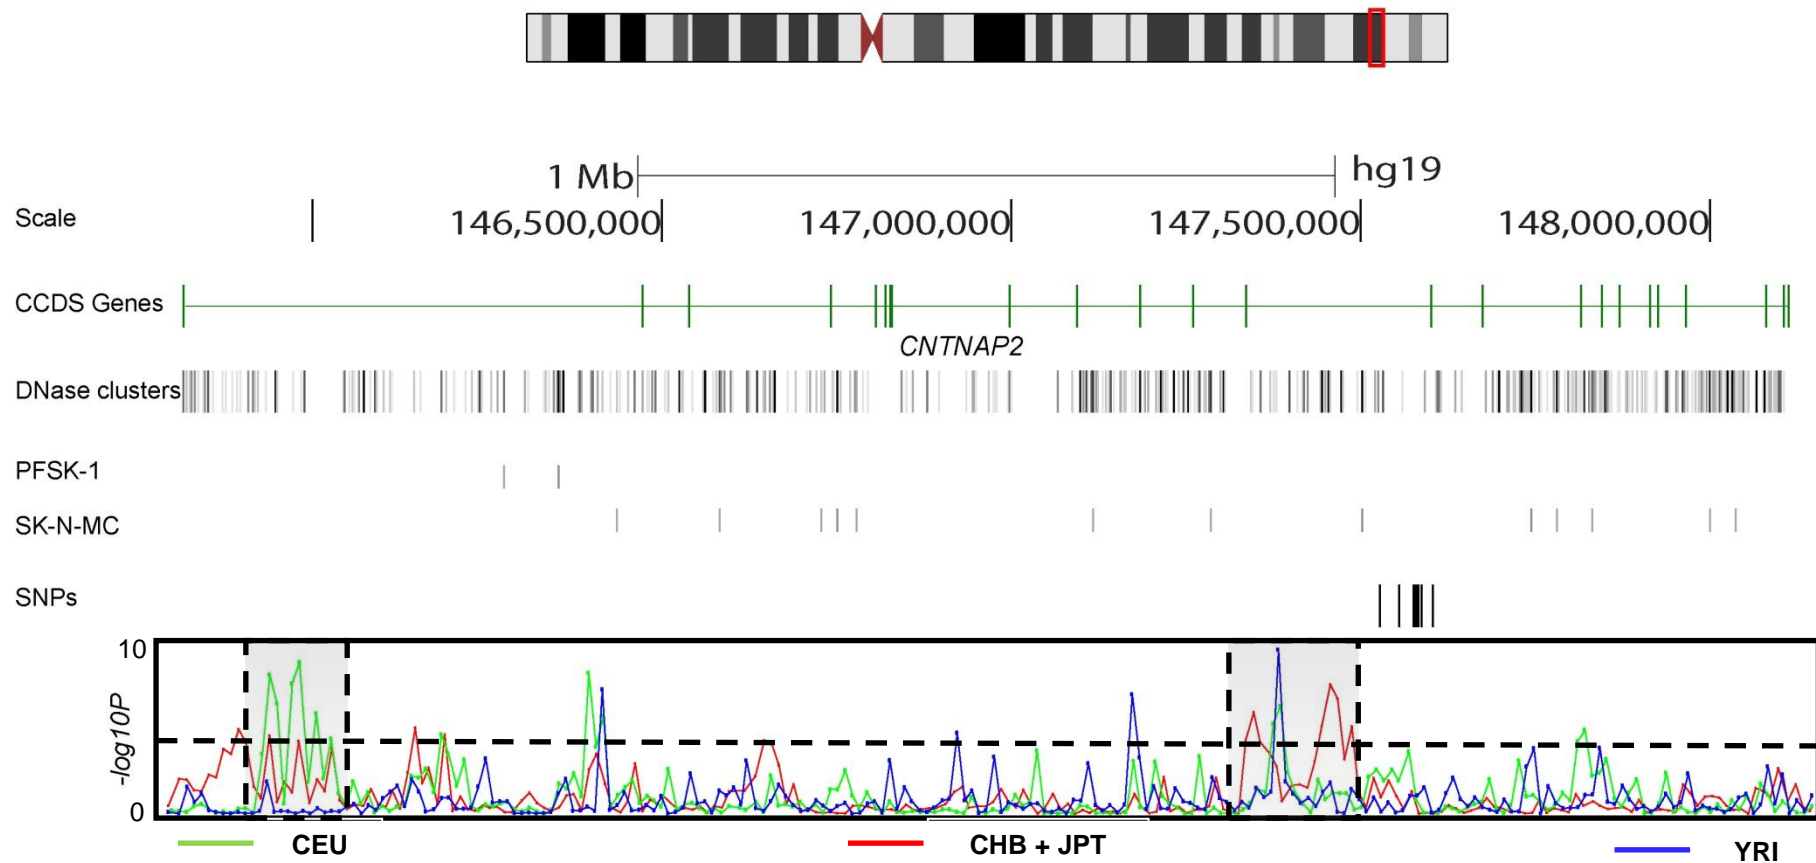

**Figure S9. Selection Signals in a 2 Mb Region on Chromosome 7 that Harbors the *CNTNAP2* Gene**

The first track shows the *CNTNAP2* gene with its exonic and intronic boundaries (CCDS). The next three tracks show region of open chromatin and FOXP2 binding sites based on ChIP-Seq in two neural cell lines; PFSK-1 and SK-N-MC. FOXP2 binding sites are represented by vertical lines in these two tracks. The SNPs track displays variants that form a risk haplotype associated with language deficits in SLI4 (Specific Language Impairment 4; OMIM# 612514). The combined p value track was generated from the separate probabilities of Tajima's D, Fay and Wu's H and CLR and the threshold represented by the dashed line, incorporates the 5% FDR for each population. Peaks above the threshold in the graph represent regions (shaded areas) that are enriched with positive selection. The window on left shows a selected region in CEU. The one on the right is selected in all populations. Variants associated with the risk haplotype lie to the right of the second window.

**Table S1A. Comparison of Sequence Coverage (per Base/Gene/Individual) between FOXP2 Targets and Matched Controls in CEU, CHB + JPT, and YRI**

|                     | <b>CEU</b> | <b>CHB + JPT</b> | <b>YRI</b> |
|---------------------|------------|------------------|------------|
| Mouse brain         | 0.1078     | 0.1528           | 0.9397     |
| Human brain         | 0.2724     | 0.3506           | 0.3046     |
| Human neuronal cell | 0.0925     | 0.2412           | 0.1209     |

Sequence coverage across three sets of FOXP2 target genes and controls in each population were compared using the two-sample Kolmogorov-Smirnov test. Test p values for each population comparisons are shown.

**Table S1B. Tajima's D and Y Estimates for Nonoverlapping 10 kb Windows on Chromosome 11 Are Positively Correlated**

|                            | <b>CEU</b>                | <b>CHB + JPT</b>          | <b>YRI</b>                |
|----------------------------|---------------------------|---------------------------|---------------------------|
| Windows                    | 12446                     | 12224                     | 12601                     |
| Y estimate mean<br>(range) | 0.4563<br>(-2.61 – +4.01) | 0.8430<br>(-2.58 – +3.96) | 0.4563<br>(-2.25 – +3.15) |
| Tajima's D mean<br>(range) | 0.7041<br>(-2.32 – +4.62) | 1.3123<br>(-2.17 – +4.73) | 0.4563<br>(-2.05 – +4.00) |
| Spearman's correlation     | 0.957*                    | 0.976*                    | 0.971*                    |

\*p value < 0.0001.

**Table S2. Summary Statistics of Frequency-Spectrum-Based Neutrality Tests in Control Gene Sets**

**A**

| Number (n) of Genes                      | Pop     | Permutation Test p Values (Unmatched Control List) |                        |                        |                        |
|------------------------------------------|---------|----------------------------------------------------|------------------------|------------------------|------------------------|
|                                          |         | Combined p Value                                   | CLR                    | Tajima's D             | Fay and Wu's H         |
| Positive controls<br>7 or more (n = 166) | CEU     | $1.4 \times 10^{-10}$                              | 0.0001                 | $< 3.2 \times 10^{-5}$ | $< 3.2 \times 10^{-5}$ |
|                                          | CHB+JPT | $1.7 \times 10^{-11}$                              | $< 3.2 \times 10^{-5}$ | $< 3.2 \times 10^{-5}$ | $< 3.2 \times 10^{-5}$ |
|                                          | YRI     | 0.9311                                             | 0.9289                 | 0.5150                 | 0.9824                 |
| Positive controls<br>8 or more (n = 67)  | CEU     | $10.0 \times 10^{-8}$                              | 0.3777                 | $< 3.2 \times 10^{-5}$ | $< 3.2 \times 10^{-5}$ |
|                                          | CHB+JPT | $1.7 \times 10^{-11}$                              | $< 3.2 \times 10^{-5}$ | $< 3.2 \times 10^{-5}$ | $< 3.2 \times 10^{-5}$ |
|                                          | YRI     | 0.3842                                             | 0.7086                 | 0.0875                 | 0.6710                 |
| Positive controls<br>9 (n = 31)          | CEU     | $6.8 \times 10^{-5}$                               | 0.4752                 | $8.0 \times 10^{-4}$   | 0.0015                 |
|                                          | CHB+JPT | $1.7 \times 10^{-11}$                              | $< 3.2 \times 10^{-5}$ | $< 3.2 \times 10^{-5}$ | $< 3.2 \times 10^{-5}$ |
|                                          | YRI     | 0.5202                                             | 0.8738                 | 0.0865                 | 0.9894                 |
| Positive controls<br>Common (n = 11)     | CEU     | $2.6 \times 10^{-9}$                               | 0.0071                 | $< 3.2 \times 10^{-5}$ | $< 3.2 \times 10^{-5}$ |
|                                          | CHB+JPT | $1.7 \times 10^{-11}$                              | $< 3.2 \times 10^{-5}$ | $< 3.2 \times 10^{-5}$ | $< 3.2 \times 10^{-5}$ |
|                                          | YRI     | $1.5 \times 10^{-5}$                               | 0.0847                 | $< 3.2 \times 10^{-5}$ | 0.0376                 |

**B**

| Number (n) of Genes         | Pop     | Permutation Test p Values (Unmatched Control List) |               |            |                |
|-----------------------------|---------|----------------------------------------------------|---------------|------------|----------------|
|                             |         | Combined p Value                                   | CLR           | Tajima's D | Fay and Wu's H |
| Negative Controls (n = 166) | CEU     | 0.8374                                             | 0.0768        | 0.8158     | 0.9945         |
|                             | CHB+JPT | 0.2685                                             | 0.2172        | 0.2400     | 0.1190         |
|                             | YRI     | 0.0540                                             | 0.3024        | 0.0107     | 0.3175         |
| Negative Controls (n = 67)  | CEU     | 0.7111                                             | 0.4016        | 0.9153     | 0.4181         |
|                             | CHB+JPT | 0.7237                                             | 0.4636        | 0.9888     | 0.3514         |
|                             | YRI     | 0.8472                                             | 0.6859        | 1.0000     | 0.3808         |
| Negative Controls (n = 31)  | CEU     | 0.4312                                             | 0.3556        | 0.9959     | 0.1457         |
|                             | CHB+JPT | 0.0015                                             | 0.0716        | 0.9707     | <b>0.0003</b>  |
|                             | YRI     | 0.5460                                             | 0.3658        | 1.0000     | 0.2263         |
| Negative Controls (n = 11)  | CEU     | 0.0306                                             | 0.1733        | 0.9995     | <b>0.0055</b>  |
|                             | CHB+JPT | 0.2749                                             | 0.8288        | 1.0000     | 0.0282         |
|                             | YRI     | <b>0.0018</b>                                      | <b>0.0048</b> | 0.9996     | <b>0.0055</b>  |

Permutation test p values for the composite likelihood ratio (CLR), Tajima's D, and Fay and Wu's H test statistics and their combined p values. Significant differences below the threshold for multiple comparisons, using a Bonferroni correction, are highlighted in black.

(A) Positively selected genes lay in regions identified as being under selection in  $\geq 7$ ,  $\geq 8$ , or 9 genome-wide scans<sup>2</sup> or a smaller dataset of 11 genes that were shared between studies.<sup>2,15,26</sup>

(B) Negative control gene lists excluded 2,601 protein-coding genes reported to be under positive selection in the literature. Gene sets of equivalent size were compared with the remaining protein-coding genes using permutation tests.

**Table S3. Summary Statistics of Frequency-Spectrum-Based Neutrality Tests for FOXP2 Target Gene Sets**

| Populations | Mouse Brain (Vernes et al. 2011)              |                                         |                                         |                                         |                                        |        |        |                                        |                              |               |        |               |
|-------------|-----------------------------------------------|-----------------------------------------|-----------------------------------------|-----------------------------------------|----------------------------------------|--------|--------|----------------------------------------|------------------------------|---------------|--------|---------------|
|             | Mann-Whitney U-Test (Matched)                 |                                         |                                         |                                         | Permutation Test (Unique Matched)      |        |        |                                        | Permutation Test (Unmatched) |               |        |               |
|             | Combined p value                              | CLR                                     | D                                       | H                                       | Combined p value                       | CLR    | D      | H                                      | Combined p value             | CLR           | D      | H             |
| CEU         | 0.2756                                        | 1.0000                                  | <b><math>1.5 \times 10^{-7}</math></b>  | 0.3814                                  | <b>0.0001</b>                          | 0.0334 | 0.0387 | <b>0.0010</b>                          | <b>0.0054</b>                | 0.0548        | 0.2260 | 0.0083        |
| CHB+JPT     | 1.0000                                        | 1.0000                                  | 1.0000                                  | 1.0000                                  | 0.8643                                 | 0.7257 | 0.9498 | 0.4081                                 | 0.9928                       | 0.7371        | 1.0000 | 0.9226        |
| YRI         | 1.0000                                        | 1.0000                                  | 0.9998                                  | 1.0000                                  | 0.0728                                 | 0.0550 | 0.3864 | 0.1460                                 | 0.6752                       | 0.3255        | 0.8667 | 0.4771        |
| Populations | Human Foetal Forebrain (Spiteri et al. 2007)  |                                         |                                         |                                         |                                        |        |        |                                        |                              |               |        |               |
|             | Mann-Whitney U-Test (Matched)                 |                                         |                                         |                                         | Permutation Test (Unique Matched)      |        |        |                                        | Permutation Test (Unmatched) |               |        |               |
|             | Combined p value                              | CLR                                     | D                                       | H                                       | Combined p value                       | CLR    | D      | H                                      | Combined p value             | CLR           | D      | H             |
| CEU         | <b><math>3.9 \times 10^{-12}</math></b>       | 0.9944                                  | <b><math>2.2 \times 10^{-16}</math></b> | <b><math>2.2 \times 10^{-16}</math></b> | <b><math>7.1 \times 10^{-5}</math></b> | 0.0221 | 0.8440 | <b><math>3.2 \times 10^{-5}</math></b> | <b>0.0007</b>                | <b>0.0023</b> | 0.5109 | <b>0.0070</b> |
| CHB+JPT     | 1.0000                                        | 1.0000                                  | 1.0000                                  | 0.0084                                  | 0.2162                                 | 0.2480 | 1.0000 | 0.0632                                 | 0.9476                       | 0.5161        | 1.0000 | 0.8415        |
| YRI         | 1.0000                                        | <b><math>2.2 \times 10^{-16}</math></b> | 0.2444                                  | 1.0000                                  | 0.1214                                 | 0.0186 | 0.5558 | 0.6269                                 | 0.1027                       | 0.0116        | 0.4762 | 0.9181        |
| Populations | Human Neuronal Cell Line (Vernes et al. 2007) |                                         |                                         |                                         |                                        |        |        |                                        |                              |               |        |               |
|             | Mann-Whitney U-Test (Matched)                 |                                         |                                         |                                         | Permutation Test (Unique Matched)      |        |        |                                        | Permutation Test (Unmatched) |               |        |               |
|             | Combined p value                              | CLR                                     | D                                       | H                                       | Combined p value                       | CLR    | D      | H                                      | Combined p value             | CLR           | D      | H             |
| CEU         | 1.0000                                        | 0.9975                                  | 0.9990                                  | 1.0000                                  | 0.0076                                 | 0.0403 | 0.9592 | <b>0.0041</b>                          | 0.5756                       | 0.1712        | 0.9640 | 0.5622        |
| CHB+JPT     | 1.0000                                        | 1.0000                                  | 0.7358                                  | 1.0000                                  | 0.7728                                 | 0.5955 | 0.9992 | 0.3260                                 | 1.0000                       | 0.9772        | 0.9933 | 0.9994        |
| YRI         | <b><math>5.9 \times 10^{-16}</math></b>       | <b><math>2.2 \times 10^{-16}</math></b> | <b><math>3.9 \times 10^{-12}</math></b> | 1.0000                                  | <b>0.0015</b>                          | 0.0121 | 0.8782 | <b>0.0014</b>                          | 0.1669                       | 0.0375        | 0.9135 | 0.3052        |

Nonparametric comparisons of the composite likelihood ratio (CLR), Tajima's D (D), and Fay and Wu's H (H) values between FOXP2 targets identified in three different studies and matched and un-matched control gene sets. For the Mann-Whitney U Test the number of comparisons (out of 1,000) in which the ranked test statistics were significantly different from expectation ( $\alpha = 0.05$ ) were estimated by the Fisher's Exact Test. Significant p values below the cut-off for multiple comparisons are highlighted in black (i.e.  $< 0.0056$  with the Bonferroni correction).

**Table S4. FOXP2 Targets Enriched with Positive Selection**

| Ensembl Gene ID | MIM Number    | Gene           | Description                                                                                                   | Study                                   | Populations       |
|-----------------|---------------|----------------|---------------------------------------------------------------------------------------------------------------|-----------------------------------------|-------------------|
| ENSG00000078328 | 605104        | <i>RBFOX1</i>  | RNA binding protein, fox-1 homolog (C. elegans) 1                                                             | Spiteri et al. 2007; Vernes et al. 2011 | CEU, CHB+JPT, YRI |
| ENSG00000105854 | 602447        | <i>PON2</i>    | paraoxonase 2                                                                                                 | Spiteri et al. 2007; Vernes et al. 2011 | CEU               |
| ENSG00000047617 | 610109        | <i>ANO2</i>    | anoctamin 2                                                                                                   | Spiteri et al. 2007                     | CEU, CHB+JPT, YRI |
| ENSG00000071242 | 601685        | <i>RPS6KA2</i> | ribosomal protein S6 kinase, 90kDa, polypeptide 2                                                             | Spiteri et al. 2007                     | CEU, CHB+JPT, YRI |
| ENSG00000078668 | 610029        | <i>VDAC3</i>   | voltage-dependent anion channel 3                                                                             | Spiteri et al. 2007                     | CEU, CHB+JPT, YRI |
| ENSG00000106397 | 603066        | <i>PLOD3</i>   | procollagen-lysine, 2-oxoglutarate 5-dioxygenase 3                                                            | Spiteri et al. 2007                     | CEU, CHB+JPT, YRI |
| ENSG00000130226 | 126141        | <i>DPP6</i>    | dipeptidyl-peptidase 6                                                                                        | Spiteri et al. 2007                     | CEU, CHB+JPT, YRI |
| ENSG00000130382 | 159556        | <i>MLLT1</i>   | myeloid/lymphoid or mixed-lineage leukemia (trithorax homolog, Drosophila); translocated to, 1                | Spiteri et al. 2007                     | CEU, CHB+JPT, YRI |
| ENSG00000168405 | Not available | <i>CMAH</i>    | cytidine monophosphate-N-acetylneuraminic acid hydroxylase (CMP-N-acetylneuraminate monooxygenase) pseudogene | Spiteri et al. 2007                     | CEU, CHB+JPT, YRI |
| ENSG00000173482 | 176888        | <i>PTPRM</i>   | protein tyrosine phosphatase, receptor type, M                                                                | Spiteri et al. 2007                     | CEU, CHB+JPT, YRI |
| ENSG00000186153 | 605131        | <i>WWOX</i>    | WW domain containing oxidoreductase                                                                           | Spiteri et al. 2007                     | CEU, CHB+JPT, YRI |
| ENSG00000204681 | 603540        | <i>GABBR1</i>  | gamma-aminobutyric acid (GABA) B receptor, 1                                                                  | Spiteri et al. 2007                     | CEU, CHB+JPT, YRI |
| ENSG00000072840 | 604831        | <i>EVC</i>     | Ellis van Creveld syndrome                                                                                    | Spiteri et al. 2007                     | CEU, CHB+JPT      |
| ENSG00000081870 | Not available | <i>HSPB11</i>  | heat shock protein family B (small), member 11                                                                | Spiteri et al. 2007                     | CEU, CHB+JPT      |
| ENSG00000100360 | Not available | <i>IFT27</i>   | intraflagellar transport 27 homolog (Chlamydomonas)                                                           | Spiteri et al. 2007                     | CEU, CHB+JPT      |
| ENSG00000101188 | 162651        | <i>NTSR1</i>   | neurotensin receptor 1 (high affinity)                                                                        | Spiteri et al. 2007                     | CEU, CHB+JPT      |
| ENSG00000120686 | 610553        | <i>UFM1</i>    | ubiquitin-fold modifier 1                                                                                     | Spiteri et al. 2007                     | CEU, CHB+JPT      |
| ENSG00000127412 | 606679        | <i>TRPV5</i>   | transient receptor potential cation channel, subfamily V, member 5                                            | Spiteri et al. 2007                     | CEU, CHB+JPT      |



|                 |               |               |                                                                                 |                     |              |
|-----------------|---------------|---------------|---------------------------------------------------------------------------------|---------------------|--------------|
| ENSG00000131051 | 604739        | <i>RBM39</i>  | RNA binding motif protein 39                                                    | Spiteri et al. 2007 | CEU, CHB+JPT |
| ENSG00000134716 | 601258        | <i>CYP2J2</i> | cytochrome P450, family 2, subfamily J, polypeptide 2                           | Spiteri et al. 2007 | CEU, CHB+JPT |
| ENSG00000151790 | Not available | <i>TDO2</i>   | tryptophan 2,3-dioxygenase                                                      | Spiteri et al. 2007 | CEU, CHB+JPT |
| ENSG00000171033 | 606059        | <i>PKIA</i>   | protein kinase (cAMP-dependent, catalytic) inhibitor alpha                      | Spiteri et al. 2007 | CEU, CHB+JPT |
| ENSG00000178913 | 600573        | <i>TAF7</i>   | TAF7 RNA polymerase II, TATA box binding protein (TBP)-associated factor, 55kDa | Spiteri et al. 2007 | CEU, CHB+JPT |
| ENSG00000198838 | 180903        | <i>RYR3</i>   | ryanodine receptor 3                                                            | Spiteri et al. 2007 | CEU, CHB+JPT |
| ENSG00000008083 | 601594        | <i>JARID2</i> | jumonji, AT rich interactive domain 2                                           | Spiteri et al. 2007 | CEU, YRI     |
| ENSG00000034152 | 602315        | <i>MAP2K3</i> | mitogen-activated protein kinase kinase 3                                       | Spiteri et al. 2007 | CEU, YRI     |
| ENSG00000042980 | 606188        | <i>ADAM28</i> | ADAM metallopeptidase domain 28                                                 | Spiteri et al. 2007 | CEU, YRI     |
| ENSG00000080493 | 603345        | <i>SLC4A4</i> | solute carrier family 4, sodium bicarbonate cotransporter, member 4             | Spiteri et al. 2007 | CEU, YRI     |
| ENSG00000081041 | 139110        | <i>CXCL2</i>  | chemokine (C-X-C motif) ligand 2                                                | Spiteri et al. 2007 | CEU, YRI     |
| ENSG00000118762 | 173910        | <i>PKD2</i>   | polycystic kidney disease 2 (autosomal dominant)                                | Spiteri et al. 2007 | CEU, YRI     |
| ENSG00000120915 | 132811        | <i>EPHX2</i>  | epoxide hydrolase 2, cytoplasmic                                                | Spiteri et al. 2007 | CEU, YRI     |
| ENSG00000126602 | 606219        | <i>TRAP1</i>  | TNF receptor-associated protein 1                                               | Spiteri et al. 2007 | CEU, YRI     |
| ENSG00000131015 | Not available | <i>ULBP2</i>  | UL16 binding protein 2                                                          | Spiteri et al. 2007 | CEU, YRI     |
| ENSG00000134812 | 609342        | <i>GIF</i>    | gastric intrinsic factor (vitamin B synthesis)                                  | Spiteri et al. 2007 | CEU, YRI     |
| ENSG00000136250 | 102593        | <i>AOAH</i>   | acyloxyacyl hydrolase (neutrophil)                                              | Spiteri et al. 2007 | CEU, YRI     |
| ENSG00000138653 | Not available | <i>NDST4</i>  | N-deacetylase/N-sulfotransferase (heparan glucosaminyl) 4                       | Spiteri et al. 2007 | CEU, YRI     |
| ENSG00000144791 | 604543        | <i>LIMD1</i>  | LIM domains containing 1                                                        | Spiteri et al. 2007 | CEU, YRI     |
| ENSG00000163394 | Not available | <i>CCKAR</i>  | cholecystokinin A receptor                                                      | Spiteri et al. 2007 | CEU, YRI     |
| ENSG00000163655 | 600358        | <i>GMPS</i>   | guanine monphosphate synthetase                                                 | Spiteri et al. 2007 | CEU, YRI     |

|                 |               |                 |                                                                           |                     |          |
|-----------------|---------------|-----------------|---------------------------------------------------------------------------|---------------------|----------|
| ENSG00000171189 | 138245        | <i>GRIK1</i>    | glutamate receptor, ionotropic, kainate 1                                 | Spiteri et al. 2007 | CEU, YRI |
| ENSG00000173762 | 186820        | <i>CD7</i>      | CD7 molecule                                                              | Spiteri et al. 2007 | CEU, YRI |
| ENSG00000182165 | Not available | <i>TP53TG1</i>  | TP53 target 1 (non-protein coding)                                        | Spiteri et al. 2007 | CEU, YRI |
| ENSG00000204628 | 176981        | <i>GNB2L1</i>   | guanine nucleotide binding protein (G protein), beta polypeptide 2-like 1 | Spiteri et al. 2007 | CEU, YRI |
| ENSG00000217555 | Not available | <i>CKLF</i>     | chemokine-like factor                                                     | Spiteri et al. 2007 | CEU, YRI |
| ENSG00000000938 | 164940        | <i>FGR</i>      | Gardner-Rasheed feline sarcoma viral (v-fgr) oncogene homolog             | Spiteri et al. 2007 | CEU      |
| ENSG00000023892 | 610094        | <i>DEF6</i>     | differentially expressed in FDCP 6 homolog (mouse)                        | Spiteri et al. 2007 | CEU      |
| ENSG00000073008 | 173850        | <i>PVR</i>      | poliovirus receptor                                                       | Spiteri et al. 2007 | CEU      |
| ENSG00000079308 | 600076        | <i>TNS1</i>     | tensin 1                                                                  | Spiteri et al. 2007 | CEU      |
| ENSG00000092969 | 190220        | <i>TGFB2</i>    | transforming growth factor, beta 2                                        | Spiteri et al. 2007 | CEU      |
| ENSG00000103326 | 603267        | <i>SOLH</i>     | small optic lobes homolog (Drosophila)                                    | Spiteri et al. 2007 | CEU      |
| ENSG00000104321 | 604775        | <i>TRPA1</i>    | transient receptor potential cation channel, subfamily A, member 1        | Spiteri et al. 2007 | CEU      |
| ENSG00000106105 | 600287        | <i>GARS</i>     | glycyl-tRNA synthetase                                                    | Spiteri et al. 2007 | CEU      |
| ENSG00000106245 | 603477        | <i>BUD31</i>    | BUD31 homolog (S. cerevisiae)                                             | Spiteri et al. 2007 | CEU      |
| ENSG00000110195 | 136430        | <i>FOLR1</i>    | folate receptor 1 (adult)                                                 | Spiteri et al. 2007 | CEU      |
| ENSG00000111653 | 608524        | <i>ING4</i>     | inhibitor of growth family, member 4                                      | Spiteri et al. 2007 | CEU      |
| ENSG00000114268 | 605320        | <i>PFKFB4</i>   | 6-phosphofructo-2-kinase/fructose-2,6-biphosphatase 4                     | Spiteri et al. 2007 | CEU      |
| ENSG00000115317 | 606441        | <i>HTRA2</i>    | HtrA serine peptidase 2                                                   | Spiteri et al. 2007 | CEU      |
| ENSG00000124469 | 114890        | <i>CEACAM8</i>  | carcinoembryonic antigen-related cell adhesion molecule 8                 | Spiteri et al. 2007 | CEU      |
| ENSG00000128283 | 606084        | <i>CDC42EP1</i> | CDC42 effector protein (Rho GTPase binding) 1                             | Spiteri et al. 2007 | CEU      |
| ENSG00000128322 | 146770        | <i>IGLL1</i>    | immunoglobulin lambda-like polypeptide 1                                  | Spiteri et al. 2007 | CEU      |

|                 |               |                 |                                                                                  |                                        |                   |
|-----------------|---------------|-----------------|----------------------------------------------------------------------------------|----------------------------------------|-------------------|
| ENSG00000134061 | 602226        | <i>CD180</i>    | CD180 molecule                                                                   | Spiteri et al. 2007                    | CEU               |
| ENSG00000137713 | 603113        | <i>PPP2R1B</i>  | protein phosphatase 2, regulatory subunit A, beta                                | Spiteri et al. 2007                    | CEU               |
| ENSG00000147571 | 122560        | <i>CRH</i>      | corticotropin releasing hormone                                                  | Spiteri et al. 2007                    | CEU               |
| ENSG00000149591 | 600818        | <i>TAGLN</i>    | transgelin                                                                       | Spiteri et al. 2007                    | CEU               |
| ENSG00000151615 | 113725        | <i>POU4F2</i>   | POU class 4 homeobox 2                                                           | Spiteri et al. 2007                    | CEU               |
| ENSG00000164106 | 603163        | <i>SCRG1</i>    | stimulator of chondrogenesis 1                                                   | Spiteri et al. 2007                    | CEU               |
| ENSG00000165474 | 121011        | <i>GJB2</i>     | gap junction protein, beta 2, 26kDa                                              | Spiteri et al. 2007                    | CEU               |
| ENSG00000167196 | 609096        | <i>FBXO22</i>   | F-box protein 22                                                                 | Spiteri et al. 2007                    | CEU               |
| ENSG00000172660 | 601574        | <i>TAF15</i>    | TAF15 RNA polymerase II, TATA box binding protein (TBP)-associated factor, 68kDa | Spiteri et al. 2007                    | CEU               |
| ENSG00000187266 | 133171        | <i>EPOR</i>     | erythropoietin receptor                                                          | Spiteri et al. 2007                    | CEU               |
| ENSG00000197702 | 608120        | <i>PARVA</i>    | parvin, alpha                                                                    | Spiteri et al. 2007                    | CEU               |
| ENSG00000198959 | 190196        | <i>TGM2</i>     | transglutaminase 2 (C polypeptide, protein-glutamine-gamma-glutamyltransferase)  | Spiteri et al. 2007                    | CEU               |
| ENSG00000213096 | 604768        | <i>ZNF254</i>   | zinc finger protein 254                                                          | Spiteri et al. 2007                    | CEU               |
| ENSG00000174469 | 604569        | <i>CNTNAP2</i>  | contactin associated protein-like 2                                              | Vernes et al. 2008; Vernes et al. 2011 | CEU, CHB+JPT, YRI |
| ENSG00000042088 | 607198        | <i>TDP1</i>     | tyrosyl-DNA phosphodiesterase 1                                                  | Vernes et al. 2011                     | CEU, CHB+JPT, YRI |
| ENSG00000134769 | 601239        | <i>DTNA</i>     | dystrobrevin, alpha                                                              | Vernes et al. 2011                     | CEU, CHB+JPT, YRI |
| ENSG00000165525 | 608378        | <i>NEMF</i>     | nuclear export mediator factor                                                   | Vernes et al. 2011                     | CEU, CHB+JPT, YRI |
| ENSG00000166446 | Not available | <i>CDYL2</i>    | chromodomain protein, Y-like 2                                                   | Vernes et al. 2011                     | CEU, CHB+JPT, YRI |
| ENSG00000181690 | 603026        | <i>PLAG1</i>    | pleiomorphic adenoma gene 1                                                      | Vernes et al. 2011                     | CEU, CHB+JPT, YRI |
| ENSG00000187908 | 601969        | <i>DMBT1</i>    | deleted in malignant brain tumors 1                                              | Vernes et al. 2011                     | CEU, CHB+JPT, YRI |
| ENSG00000214376 | Not available | <i>C11orf90</i> | chromosome 11 open reading frame 90                                              | Vernes et al. 2011                     | CEU, CHB+JPT, YRI |

|                 |               |                   |                                                                               |                    |              |
|-----------------|---------------|-------------------|-------------------------------------------------------------------------------|--------------------|--------------|
| ENSG00000074621 | 603617        | <i>SLC24A1</i>    | solute carrier family 24 (sodium/potassium/calcium exchanger), member 1       | Vernes et al. 2011 | CEU, CHB+JPT |
| ENSG00000147316 | 607117        | <i>MCPH1</i>      | microcephalin 1                                                               | Vernes et al. 2011 | CEU, CHB+JPT |
| ENSG00000149575 | 601327        | <i>SCN2B</i>      | sodium channel, voltage-gated, type II, beta                                  | Vernes et al. 2011 | CEU, CHB+JPT |
| ENSG00000168824 | 607645        | <i>AC110814.1</i> | Neuron-specific protein family member 1                                       | Vernes et al. 2011 | CEU, CHB+JPT |
| ENSG00000171502 | 610025        | <i>COL24A1</i>    | collagen, type XXIV, alpha 1                                                  | Vernes et al. 2011 | CEU, CHB+JPT |
| ENSG00000197993 | 613883        | <i>KEL</i>        | Kell blood group, metallo-endopeptidase                                       | Vernes et al. 2011 | CEU, CHB+JPT |
| ENSG00000212916 | Not available | <i>KIAA1383</i>   | KIAA1383                                                                      | Vernes et al. 2011 | CEU, CHB+JPT |
| ENSG00000006468 | 600541        | <i>ETV1</i>       | ets variant 1                                                                 | Vernes et al. 2011 | CEU, YRI     |
| ENSG00000092051 | Not available | <i>JPH4</i>       | junctophilin 4                                                                | Vernes et al. 2011 | CEU, YRI     |
| ENSG00000111716 | 150100        | <i>LDHB</i>       | lactate dehydrogenase B                                                       | Vernes et al. 2011 | CEU, YRI     |
| ENSG00000150625 | 601275        | <i>GPM6A</i>      | glycoprotein M6A                                                              | Vernes et al. 2011 | CEU, YRI     |
| ENSG00000168062 | Not available | <i>BATF2</i>      | basic leucine zipper transcription factor, ATF-like 2                         | Vernes et al. 2011 | CEU, YRI     |
| ENSG00000171368 | 608773        | <i>TPPP</i>       | tubulin polymerization promoting protein                                      | Vernes et al. 2011 | CEU, YRI     |
| ENSG00000172179 | 176760        | <i>PRL</i>        | prolactin                                                                     | Vernes et al. 2011 | CEU, YRI     |
| ENSG00000176907 | 607702        | <i>C8orf4</i>     | chromosome 8 open reading frame 4                                             | Vernes et al. 2011 | CEU, YRI     |
| ENSG00000179168 | 609966        | <i>GGN</i>        | gametogenetin                                                                 | Vernes et al. 2011 | CEU, YRI     |
| ENSG00000196800 | Not available | <i>SPINK14</i>    | serine peptidase inhibitor, Kazal type 14 (putative)                          | Vernes et al. 2011 | CEU, YRI     |
| ENSG00000008197 | 610161        | <i>TFAP2D</i>     | transcription factor AP-2 delta (activating enhancer binding protein 2 delta) | Vernes et al. 2011 | CEU          |
| ENSG00000009790 | 608255        | <i>TRAF3IP3</i>   | TRAF3 interacting protein 3                                                   | Vernes et al. 2011 | CEU          |
| ENSG00000067533 | 611193        | <i>RRP15</i>      | ribosomal RNA processing 15 homolog (S. cerevisiae)                           | Vernes et al. 2011 | CEU          |
| ENSG00000083782 | 601657        | <i>EPYC</i>       | epiphycan                                                                     | Vernes et al. 2011 | CEU          |
| ENSG00000084444 | Not available | <i>KIAA1467</i>   | KIAA1467                                                                      | Vernes et al. 2011 | CEU          |

|                 |               |                 |                                                                                                                  |                    |     |
|-----------------|---------------|-----------------|------------------------------------------------------------------------------------------------------------------|--------------------|-----|
| ENSG00000085274 | 606042        | <i>MYNN</i>     | myoneurin                                                                                                        | Vernes et al. 2011 | CEU |
| ENSG00000091986 | 608298        | <i>CCDC80</i>   | coiled-coil domain containing 80                                                                                 | Vernes et al. 2011 | CEU |
| ENSG00000100083 | 606004        | <i>GGA1</i>     | golgi-associated, gamma adaptin ear containing, ARF binding protein 1                                            | Vernes et al. 2011 | CEU |
| ENSG00000105829 | 605456        | <i>BET1</i>     | blocked early in transport 1 homolog ( <i>S. cerevisiae</i> )                                                    | Vernes et al. 2011 | CEU |
| ENSG00000106399 | 179837        | <i>RPA3</i>     | replication protein A3, 14kDa                                                                                    | Vernes et al. 2011 | CEU |
| ENSG00000112234 | 605654        | <i>FBXL4</i>    | F-box and leucine-rich repeat protein 4                                                                          | Vernes et al. 2011 | CEU |
| ENSG00000112290 | 605035        | <i>WASF1</i>    | WAS protein family, member 1                                                                                     | Vernes et al. 2011 | CEU |
| ENSG00000113578 | 131220        | <i>FGF1</i>     | fibroblast growth factor 1 (acidic)                                                                              | Vernes et al. 2011 | CEU |
| ENSG00000114120 | Not available | <i>SLC25A36</i> | solute carrier family 25, member 36                                                                              | Vernes et al. 2011 | CEU |
| ENSG00000114491 | 613891        | <i>UMPS</i>     | uridine monophosphate synthetase                                                                                 | Vernes et al. 2011 | CEU |
| ENSG00000122390 | Not available | <i>NAT15</i>    | N-acetyltransferase 15 (GCN5-related, putative)                                                                  | Vernes et al. 2011 | CEU |
| ENSG00000126785 | 607653        | <i>RHOJ</i>     | ras homolog gene family, member J                                                                                | Vernes et al. 2011 | CEU |
| ENSG00000130943 | 604670        | <i>PKDREJ</i>   | polycystic kidney disease (polycystin) and REJ homolog (sperm receptor for egg jelly homolog, sea urchin)        | Vernes et al. 2011 | CEU |
| ENSG00000132964 | Not available | <i>CDK8</i>     | cyclin-dependent kinase 8                                                                                        | Vernes et al. 2011 | CEU |
| ENSG00000135569 | 607405        | <i>TAAR5</i>    | trace amine associated receptor 5                                                                                | Vernes et al. 2011 | CEU |
| ENSG00000135622 | 603706        | <i>SEMA4F</i>   | sema domain, immunoglobulin domain (Ig), transmembrane domain (TM) and short cytoplasmic domain, (semaphorin) 4F | Vernes et al. 2011 | CEU |
| ENSG00000137819 | 607781        | <i>PAQR5</i>    | progesterin and adipoQ receptor family member V                                                                  | Vernes et al. 2011 | CEU |
| ENSG00000137942 | 608848        | <i>FNBP1L</i>   | formin binding protein 1-like                                                                                    | Vernes et al. 2011 | CEU |
| ENSG00000138376 | 601593        | <i>BARD1</i>    | BRCA1 associated RING domain 1                                                                                   | Vernes et al. 2011 | CEU |
| ENSG00000138629 | 609748        | <i>UBL7</i>     | ubiquitin-like 7 (bone marrow stromal cell-derived)                                                              | Vernes et al. 2011 | CEU |

|                 |               |                   |                                                                                    |                    |     |
|-----------------|---------------|-------------------|------------------------------------------------------------------------------------|--------------------|-----|
| ENSG00000141668 | 600433        | <i>CBLN2</i>      | cerebellin 2 precursor                                                             | Vernes et al. 2011 | CEU |
| ENSG00000143190 | 164175        | <i>POU2F1</i>     | POU class 2 homeobox 1                                                             | Vernes et al. 2011 | CEU |
| ENSG00000152705 | 609120        | <i>CATSPER3</i>   | cation channel, sperm associated 3                                                 | Vernes et al. 2011 | CEU |
| ENSG00000155111 | 614720        | <i>CDK19</i>      | cyclin-dependent kinase 19                                                         | Vernes et al. 2011 | CEU |
| ENSG00000158296 | 606411        | <i>SLC13A3</i>    | solute carrier family 13 (sodium-dependent dicarboxylate transporter), member 3    | Vernes et al. 2011 | CEU |
| ENSG00000162374 | 168360        | <i>ELAVL4</i>     | ELAV (embryonic lethal, abnormal vision, <i>Drosophila</i> )-like 4 (Hu antigen D) | Vernes et al. 2011 | CEU |
| ENSG00000163636 | Not available | <i>PSMD6</i>      | proteasome (prosome, macropain) 26S subunit, non-ATPase, 6                         | Vernes et al. 2011 | CEU |
| ENSG00000165714 | Not available | <i>LOH12CR1</i>   | loss of heterozygosity, 12, chromosomal region 1                                   | Vernes et al. 2011 | CEU |
| ENSG00000166035 | 151670        | <i>LIPC</i>       | lipase, hepatic                                                                    | Vernes et al. 2011 | CEU |
| ENSG00000168066 | 601516        | <i>SF1</i>        | splicing factor 1                                                                  | Vernes et al. 2011 | CEU |
| ENSG00000168569 | Not available | <i>TMEM223</i>    | transmembrane protein 223                                                          | Vernes et al. 2011 | CEU |
| ENSG00000175374 | Not available | <i>SPESP1</i>     | sperm equatorial segment protein 1                                                 | Vernes et al. 2011 | CEU |
| ENSG00000182255 | 176266        | <i>KCNA4</i>      | potassium voltage-gated channel, shaker-related subfamily, member 4                | Vernes et al. 2011 | CEU |
| ENSG00000183401 | Not available | <i>CCDC159</i>    | coiled-coil domain containing 159                                                  | Vernes et al. 2011 | CEU |
| ENSG00000184378 | Not available | <i>AC078802.1</i> | Actin-related protein M1                                                           | Vernes et al. 2011 | CEU |
| ENSG00000198742 | 605568        | <i>SMURF1</i>     | SMAD specific E3 ubiquitin protein ligase 1                                        | Vernes et al. 2011 | CEU |
